# Supplementary material for: Highly efficient catalytic oxidation of 5-hydroxymethylfurfural to 2,5-furandicarboxylic acid using bimetallic Pt–Cu alloy nanoparticles as catalysts
Source: Royal Society of Chemistry journal article supplement (doi:10.1039/d1cc05757j), 2021-12-20
Supplement: d1cc05757j1.pdf [file d1cc05757j1.pdf]

## Supporting Information

### Highly efficient catalytic oxidation of 5-hydroxymethylfurfural into 2,5-furandicarboxylic acid with bimetallic Pt-Cu alloy nanoparticles catalyst

**Xiaomeng Cheng,<sup>ab</sup> Shaopeng Li,<sup>c</sup> Shulin Liu,<sup>ab</sup> Yu Xin,<sup>ab</sup> Junjuan Yang,<sup>a</sup> Bingfeng Chen<sup>\*a</sup>, and Huizhen Liu<sup>\*ab</sup>**

<sup>a</sup> Beijing National Laboratory for Molecular Sciences, CAS Key Laboratory of Colloid and Interface and Thermodynamics Institute of Chemistry, Chinese Academy of Sciences, Beijing 100190, P. R. China. E-mail: chenbf@iccas.ac.cn, liuhz@iccas.ac.cn

<sup>b</sup> University of Chinese Academy of Sciences, Beijing 100149, P. R. China

<sup>c</sup> Tianjin Key Laboratory of Molecular Optoelectronic Sciences, Department of Chemistry, Institute of Molecular Aggregation Science, Tianjin University, Tianjin 300072, P. R. China.

#### Table of Contents:

#### 1. Experimental details

##### Materials

##### Synthesis of Pt-Cu/AC

##### Oxidation reaction

##### Characterization

- Figure S1** XRD patterns of Pt-Cu<sub>1.5</sub>/AC catalyst, Cu/AC, Pt/AC and pure activated charcoal.
- Figure S2.** XRD patterns of (a) different ratio of Pt-Cu bimetallic nanoparticles and standard patterns of Pt and Cu cubic phase; and (b) Pt-Cu<sub>1.5</sub> nanoparticles with standard Pt-Cu alloy pattern.
- Figure S3.** HR-TEM images and corresponding EDS line mapping profiles of (a,e) Pt-Cu<sub>4</sub>/AC; (b,f) Pt-Cu<sub>2</sub>/AC; (c,g) Pt<sub>2</sub>-Cu/AC and (d,h)Pt<sub>4</sub>-Cu/AC.
- Figure S4** Recycling test over Pt-Cu<sub>1.5</sub>/C.
- Table S1.** A comparative table with the reported catalytic systems for the oxidation of HMF to FDCA.

## 1. Experimental section

### Materials

Activated charcoal(AC) and  $\text{H}_2\text{PtCl}_6 \cdot 6\text{H}_2\text{O}$  were obtained from Acros Organic.  $\text{CuCl}_2$  was obtained from Alfa Aesar China Co., Ltd. HMF(98%), FDCA(97%), FFCA(98%), DFF(98%) and HMFCA(98%) were obtained from J&K Scientific Ltd.  $\text{NaBH}_4$  was obtained from Guangdong Guanghua Sci-Tech Co., Ltd. High-purity oxygen was obtained from Beijing Jinghui gas Sci-Tech Co., Ltd. All the chemical reagents were used as received without any further purification. In the process of preparing the catalyst, deionized water was used.

### Synthesis of Pt-Cu/AC

500 mg of activated charcoal were suspended in 50 mL water. After stirring for 1 h, the appropriate amount of  $\text{H}_2\text{PtCl}_6$  and  $\text{CuCl}_2$  solution was added dropwise into AC dispersion under stirring. Then aqueous solution containing fresh  $\text{NaBH}_4$  was added drop-wise with a continuous magnetic stirring, the reaction solution was kept on stirring for 2 h to complete the reduction reaction. The obtained granules were collected by centrifuging, washed with ultrapure water ( $3 \times 30$  mL) and ethanol ( $2 \times 30$  mL) and dried in a vacuum oven at  $60^\circ\text{C}$  for 12 h.

### Oxidation reaction

The HMF oxidation reaction was carried out in a Teflon-lined stainless-steel reactor. In a typical experiment, 0.3mmol HMF, catalyst and solvent were packed into the reactor. The reactor was purged with pure oxygen twice to remove the air and finally boosted to 1MPa. Then the temperature was increased to  $150^\circ\text{C}$  at 600 rpm. After 6 h, the reactor was placed in ice bath and the gas was released. The liquid reaction mixture was centrifuged and filtered. The quantitative analysis of the liquid products was conducted using HPLC equipment. The HPLC analysis was conducted on a Shimadzu Prominence liquid chromatograph (LC-20TA) equipped with a C18 column (XBridge,  $4.6 \text{ mm} \times 150 \text{ mm} \times 3.5 \mu\text{m}$  particle size, Waters Corporation) and an UV-Vis detector (SPD-20A). Mobile phase A is 0.1% formic acid aqueous solution adjusted to  $\text{pH} \sim 3$  with ammonium formate and mobile phase B was acetonitrile. The flow rate is  $0.4 \text{ mL min}^{-1}$ . The quantification of HMF and its oxidation products was performed based on the calibration curves of those standard compounds purchased from commercial vendors. The external standard method was used as the quantitative method of conversion of HMF and yield of FDCA, FFCA and DFF.

$$\text{HMF Conversion (\%)} = \frac{\text{mol of HMF consumed}}{\text{mol of initial HMF}} \times 100\%$$

$$\text{Yield (\%)} = \frac{\text{mol of product formed}}{\text{mol of initial HMF}} \times 100\%$$

### Characterization

The transmission electron microscopy (TEM) images were obtained using JEOL-2100F and JEOL-F200 high-resolution transmission electron microscopes (HR-TEM) equipped with EDX. Powder X-ray diffraction (XRD) patterns were collected using a X-ray diffractometer (Model D/MAX2500, Rigaka) with  $\text{Cu-K}\alpha$  radiation. X-ray photoelectron

spectroscopy (XPS) analysis was performed on a Thermo Scientific ESCA Lab 250Xi using 200 W monochromatic Al K $\alpha$  radiation, and a 500  $\mu\text{m}$  X-ray spot was used. The base pressure in the analysis chamber was about  $3 \times 10^{-10}$  m bar. Typically, the hydrocarbon C 1s line at 284.8 eV from adventitious carbon was used for energy referencing. The metal contents of the catalysts were determined by using a Perkin Elmer Optima 2000 OV inductively coupled plasma-optical emission spectroscopy (ICP-OES).

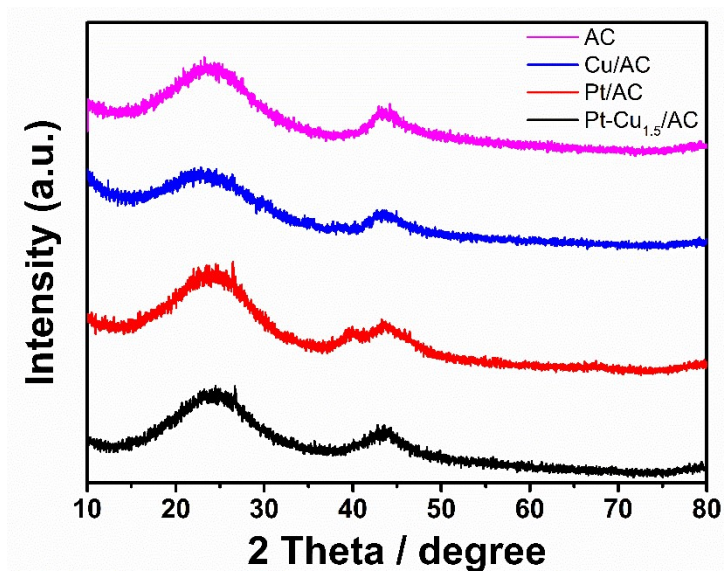

Figure S1. XRD patterns of Pt-Cu<sub>1.5</sub>/AC, Cu/AC, Pt/AC and pure activated charcoal.

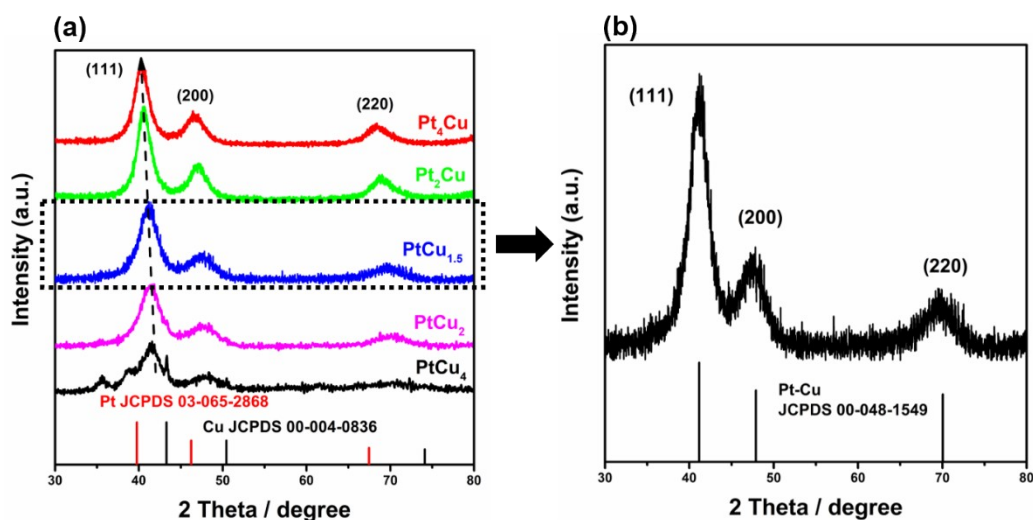

**Figure S2.** XRD patterns of (a) different ratios of Pt-Cu bimetallic nanoparticles and standard patterns of Pt and Cu cubic phase; and (b) Pt-Cu<sub>1.5</sub> nanoparticles with standard Pt-Cu alloy pattern.

To further investigate the synergistic effects of the Pt-Cu nanoparticles, the Pt-Cu bimetallic nanoparticles were prepared by the similar method in the absence of the carbon supports, and the related XRD patterns were displayed in Figure S2. The peaks in the Pt-Cu pattern shifted slightly to a higher angle, locating between Cu (JCPDS No.00-004-0836) and Pt (JCPDS No. 03-065-2868), indicating the reduction of structural lattice parameter due to the formation of the alloy.

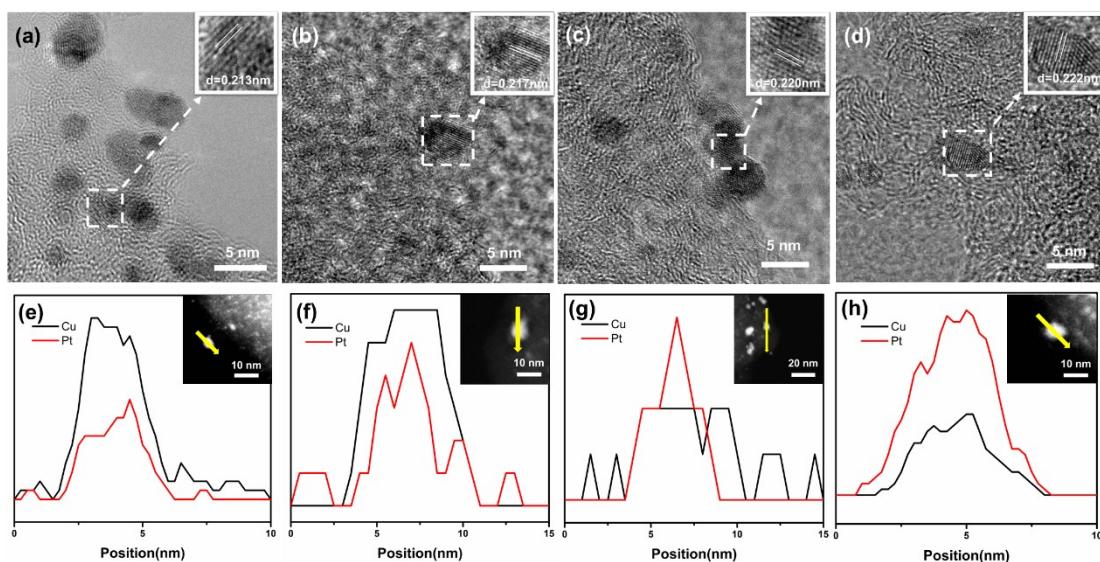

**Figure S3.** HR-TEM images and corresponding EDS line mapping profiles of (a,e) Pt-Cu<sub>4</sub>/AC; (b,f) Pt-Cu<sub>2</sub>/AC; (c,g) Pt<sub>2</sub>-Cu/AC and (d,h)Pt<sub>4</sub>-Cu/AC.

Figure S3 presents the HR-TEM images of Pt-Cu<sub>4</sub>/AC, Pt-Cu<sub>2</sub>/AC, Pt<sub>2</sub>-Cu/AC and Pt<sub>4</sub>-Cu/AC catalysts. The Pt-Cu nanocrystals display well-defined lattice fringes with the lattice spacing of 0.213-0.222 nm (Fig. S3a-d), which is slightly smaller than the d-spacing of cubic Pt (111) (0.226 nm) and larger than that of cubic Cu (111) (0.209 nm). These results demonstrate that these supported Pt-Cu nanocrystals existed in the alloyed state, and the variation of lattice spacing of Pt-Cu alloy is due to the compression of Pt crystals cells caused by the addition of Cu. Moreover, the composition distributions are uniform for the studied nanoparticle according to the EDS line mapping profiles (Fig. S3e-h).

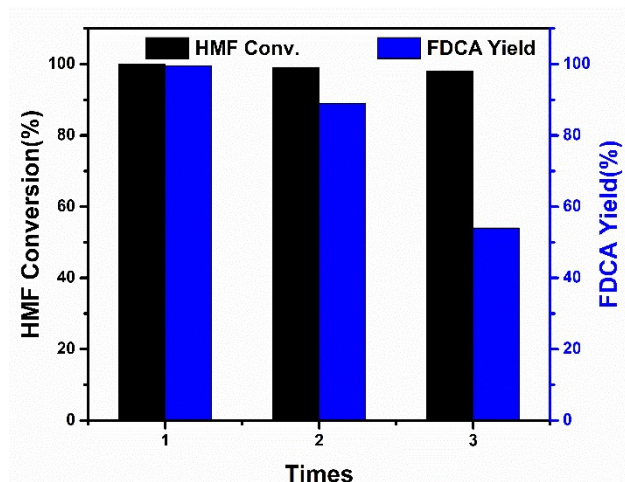

**Figure S4.** Recycling test over Pt-Cu<sub>1.5</sub>/C. Reaction conditions: 0.3mmol of HMF, 40mg catalyst, 4 mL of H<sub>2</sub>O, 1 MPa of O<sub>2</sub>, 150°C / 6h.

As displayed in Figure S5, the recyclability of Pt-Cu<sub>1.5</sub>/AC catalyst has been tested, and the conversion of HMF did not show a noticeable decrease accompany with moderate decrease in the FDCA yield after the second reuse. According to the ICP analysis of the reused catalyst, the loading of Pt and Cu were 0.44 wt.% and 0.15 wt.%, respectively. Compared with the fresh catalyst, the slightly loss of Cu species resulted in the decrease of FDCA yield.

**Table S1.** A comparative table with the reported catalytic systems for the oxidation of HMF to FDCA.

| Entry                          | Catalyst                                            | Solvent          | $P(O_2)$<br>[MPa] | Base/Additive                  | T<br>(°C) | Time<br>(h) | HMF<br>Conversion<br>[%] | FDCA<br>Selectivity<br>[%] | TON<br>or<br>TOF(h <sup>-1</sup> ) | Ref.      |
|--------------------------------|-----------------------------------------------------|------------------|-------------------|--------------------------------|-----------|-------------|--------------------------|----------------------------|------------------------------------|-----------|
| <b>Heterogeneous catalysts</b> |                                                     |                  |                   |                                |           |             |                          |                            |                                    |           |
| 1                              | Pt-Cu/AC                                            | H <sub>2</sub> O | 1.0               | -                              | 150       | 6           | 100                      | 99                         | 135                                | This work |
| 2                              | Pt-PVP-GLY                                          | H <sub>2</sub> O | 0.1               | -                              | 80        | 24          | 99                       | 99                         | 2.8                                | 1         |
| 3                              | Pt@Dowex-Na                                         | H <sub>2</sub> O | 2                 | -                              | 120       | 22          | 100                      | 98                         | 14.4                               | 2         |
| 4                              | Pt/C-O-Mg                                           | H <sub>2</sub> O | 1                 | -                              | 110       | 12          | >99                      | 97                         | 20                                 | 3         |
| 5                              | Pt/Ni <sub>25a</sub>                                | H <sub>2</sub> O | 1                 | -                              | 100       | 12          | 100                      | 100                        | 22.2                               | 4         |
| 6                              | Pt/NC-CeO <sub>2</sub>                              | H <sub>2</sub> O | 0.4               | -                              | 150       | 4           | 100                      | 99.9                       | 114                                | 5         |
| 7                              | Pt/PVP-ACS-800                                      | H <sub>2</sub> O | 1                 | -                              | 110       | 5           | >99                      | >99                        | 21.5                               | 6         |
| 8                              | Pt-Ni/AC-15ALD                                      | H <sub>2</sub> O | 0.8               | -                              | 100       | 15          | >99                      | 98                         | 24.3                               | 7         |
| 9                              | Au/MgO                                              | H <sub>2</sub> O | 2.6               | -                              | 110       | 2           | 99                       | 91                         | 25                                 | 8         |
| 10                             | Au/HT                                               | H <sub>2</sub> O | 0.1               | -                              | 95        | 7           | >99                      | >99                        | 32                                 | 9         |
| 11                             | Au-Pd/MgO                                           | H <sub>2</sub> O | 0.5               | -                              | 100       | 12          | 100                      | 99                         | 80                                 | 10        |
| 12                             | AuPd/La-CaMgAl-LDH                                  | H <sub>2</sub> O | 0.5               | -                              | 100       | 6           | 96.1                     | 89.4                       | 6.4                                | 11        |
| 13                             | AuPd-nNiO                                           | H <sub>2</sub> O | 1                 | -                              | 90        | 6           | 95                       | 70                         | 19.5                               | 12        |
| 14                             | Ru/ZrO <sub>2</sub> H-aero                          | H <sub>2</sub> O | 1                 | -                              | 120       | 16          | 100                      | 97                         | 10.9                               | 13        |
| 15                             | Ru/Mn <sub>6</sub> Ce <sub>1</sub> O <sub>7</sub>   | H <sub>2</sub> O | 1                 | -                              | 150       | 15          | 100                      | >99                        | 15                                 | 14        |
| 16                             | Ru/CTF                                              | H <sub>2</sub> O | 2                 | -                              | 140       | 3           | 99                       | 77.6                       | 40                                 | 15        |
| 17                             | Co-N-C-9.6                                          | H <sub>2</sub> O | 1.0               | NaHCO <sub>3</sub>             | 120       | 1           | >99                      | 94.3                       | 477                                | 16        |
| 18                             | Ru-Fe <sub>3</sub> O <sub>4</sub> @SiO <sub>2</sub> | H <sub>2</sub> O | 1.0               | n-butylamine                   | 110       | 48          | 92                       | 80.6                       | 2.4                                | 17        |
| 19                             | Pd-MnO <sub>2</sub>                                 | H <sub>2</sub> O | 0.1               | K <sub>2</sub> CO <sub>3</sub> | 100       | 4           | 100                      | 88.1                       | 151.2                              | 18        |



|    |                                                                                                        |                  |                         |                                 |     |    |      |      |       |    |
|----|--------------------------------------------------------------------------------------------------------|------------------|-------------------------|---------------------------------|-----|----|------|------|-------|----|
| 20 | Pd@Beta                                                                                                | H <sub>2</sub> O | 0.1                     | Na <sub>2</sub> CO <sub>3</sub> | 90  | 24 | 99   | 98   | 451   | 19 |
| 21 | Pd/HPGS                                                                                                | H <sub>2</sub> O | 0.1                     | NaOH                            | 50  | 5  | 99   | 82   | 62    | 20 |
| 22 | Pd/C@Fe <sub>3</sub> O <sub>4</sub>                                                                    | H <sub>2</sub> O | 30 mL min <sup>-1</sup> | K <sub>2</sub> CO <sub>3</sub>  | 80  | 6  | 98.4 | 86.7 | 4.5   | 21 |
| 23 | γ-Fe <sub>2</sub> O <sub>3</sub> @HAP-Pd(0)                                                            | H <sub>2</sub> O | 30 mL min <sup>-1</sup> | K <sub>2</sub> CO <sub>3</sub>  | 100 | 6  | 97   | 92.9 | 3.09  | 22 |
| 24 | C-Fe <sub>3</sub> O <sub>4</sub> -Pd                                                                   | H <sub>2</sub> O | 30 mL min <sup>-1</sup> | K <sub>2</sub> CO <sub>3</sub>  | 80  | 4  | 98.2 | 91.8 | 13.4  | 23 |
| 25 | Pd/C@Fe <sub>3</sub> O <sub>4</sub>                                                                    | H <sub>2</sub> O | 30 mL min <sup>-1</sup> | K <sub>2</sub> CO <sub>3</sub>  | 80  | 6  | 100  | 87.8 | 4.6   | 24 |
| 26 | Ni <sub>0.90</sub> Pd <sub>0.10</sub>                                                                  | H <sub>2</sub> O | air bubbling            | Na <sub>2</sub> CO <sub>3</sub> | 80  |    |      | 70   | 35    | 25 |
| 27 | Pt-NCs                                                                                                 | H <sub>2</sub> O | 75 mL min <sup>-1</sup> | NaHCO <sub>3</sub>              | 100 | 10 | 100  | 95.1 | 391.8 | 26 |
| 28 | Au/TiO <sub>2</sub>                                                                                    | H <sub>2</sub> O | 2                       | NaOH                            | 25  | 22 | 100  | 79   | 4.5   | 27 |
| 29 | Pt <sub>imp</sub> -Bi/C <sub>3</sub> SW                                                                | H <sub>2</sub> O | 4                       | Na <sub>2</sub> CO <sub>3</sub> | 100 | 3  | >99  | 99   | 16.7  | 28 |
| 30 | Pt-Bi/TiO <sub>2</sub>                                                                                 | H <sub>2</sub> O | 4                       | Na <sub>2</sub> CO <sub>3</sub> | 100 | 10 | >99  | >99  | 9.9   | 29 |
| 31 | CoO <sub>x</sub> -MC                                                                                   | H <sub>2</sub> O | 0.5                     | K <sub>2</sub> CO <sub>3</sub>  | 80  | 30 | 98.3 | 95.3 | 2.22  | 30 |
| 32 | AuCe <sub>25</sub> Zr                                                                                  | H <sub>2</sub> O | 1                       | NaOH                            | 70  | 4  | >99  | 85   | 17.5  | 31 |
| 33 | Au/HT                                                                                                  | H <sub>2</sub> O | 10 mL min <sup>-1</sup> | NaOH                            | 90  | 7  | >99  | 89   | 11.2  | 32 |
| 34 | Au/TiO <sub>2</sub>                                                                                    | H <sub>2</sub> O | 2                       | NaOH                            | 30  | 18 | >99  | 71   | 5.6   | 33 |
| 35 | Au/ZrO <sub>2</sub>                                                                                    | H <sub>2</sub> O | 1                       | NaOH                            | 125 | 5  | >99  | 89   | 67    | 34 |
| 36 | Au/HT                                                                                                  | H <sub>2</sub> O | 0.1                     | Na <sub>2</sub> CO <sub>3</sub> | 95  | 7  | 99   | 99   | 1.4   | 35 |
| 37 | Au <sub>1</sub> -Pd <sub>1</sub> @PECN                                                                 | H <sub>2</sub> O | 10 mL min <sup>-1</sup> | K <sub>2</sub> CO <sub>3</sub>  | 90  | 12 | 99.7 | 99   | 36.3  | 36 |
| 38 | Au <sub>1</sub> Pd <sub>3</sub> /pBN <sub>2</sub> C-800                                                | H <sub>2</sub> O | 3                       | Na <sub>2</sub> CO <sub>3</sub> | 100 | 24 | 100  | 97.6 | 29    | 37 |
| 39 | Au <sub>8</sub> -Pd <sub>2</sub> /AC                                                                   | H <sub>2</sub> O | 0.3                     | NaOH                            | 60  | 2  | >99  | 99   | 100   | 38 |
| 40 | Au/MZ-600                                                                                              | H <sub>2</sub> O | 50 mL min <sup>-1</sup> | NaOH                            | 95  | 4  | 100  | 95   | 71    | 39 |
| 41 | Au/HSAG-N                                                                                              | H <sub>2</sub> O | 1                       | NaHCO <sub>3</sub>              | 90  | 12 | >99  | 75   | 1195  | 40 |
| 42 | Au-Cu/TiO <sub>2</sub>                                                                                 | H <sub>2</sub> O | 1                       | NaOH                            | 95  | 4  | >99  | 99   | 120   | 41 |
| 43 | Au <sub>2</sub> O <sub>3</sub> /Ag <sub>2</sub> O/Cu(NO <sub>3</sub> ) <sub>2</sub> ·3H <sub>2</sub> O | H <sub>2</sub> O | 0.1                     | NaOH                            | 42  | 16 | 99   | 93   | 2.37  | 42 |
| 44 | Ru/C                                                                                                   | H <sub>2</sub> O | 0.2                     | Na <sub>2</sub> CO <sub>3</sub> | 120 | 5  | 100  | 93   | 45    | 43 |
| 45 | M400(Mn <sub>2</sub> O <sub>3</sub> )                                                                  | H <sub>2</sub> O | 1.4                     | NaHCO <sub>3</sub>              | 100 | 24 | >99  | 99.5 | 1.05  | 44 |

|                              |                                  |                       |                                       |                    |     |     |     |      |       |    |  |
|------------------------------|----------------------------------|-----------------------|---------------------------------------|--------------------|-----|-----|-----|------|-------|----|--|
| 46                           | CuMn <sub>2</sub> O <sub>4</sub> | H <sub>2</sub> O      | 1                                     | NaHCO <sub>3</sub> | 120 | 18  | 100 | 92.1 | 0.05  | 45 |  |
| 47                           | Mn <sub>2</sub> O <sub>3</sub>   | H <sub>2</sub> O      | 1                                     | NaHCO <sub>3</sub> | 100 | 24  | >99 | 91   | 0.91  | 46 |  |
| 48                           | MnO <sub>2</sub>                 | H <sub>2</sub> O      | 1                                     | NaHCO <sub>3</sub> | 100 | 24  | >99 | 74   | 0.014 | 47 |  |
| <b>Homogeneous catalysts</b> |                                  |                       |                                       |                    |     |     |     |      |       |    |  |
| 49                           | Co/Mn/Br                         | H <sub>2</sub> O/HOAc | CO <sub>2</sub> /O <sub>2</sub> = 1/1 | -                  | 180 | 0.5 | >99 | 78.8 | 5.9   | 48 |  |
|                              |                                  |                       | 6MPa                                  |                    |     |     |     |      |       |    |  |

TOF value was calculated according to the equation below:

TOF=

$$\frac{\text{Convention of HMF(mol)}}{\text{Metal loading on the catalyst surface(mol)} * \text{Reaction}}$$

### Supplementary References:

1. S. Siankevich, G. Savoglidis, Z. Fei, G. Laurenczy, D. T. L. Alexander, N. Yan and P. J. Dyson, *J. Catal.*, 2014, **315**, 67–74.
2. F. Liguori, P. Barbaro and N. Calisi, *ChemSusChem*, 2019, **12**, 2558 – 2563.
3. X. Han, L. Geng, Y. Guo, R. Jia, X. Liu, Y. Zhang and Y. Wang, *Green Chem.*, 2016, **18**, 1597–1604.
4. H. Zhang, T. Gao, Q. Cao and W. Fang, *ACS Sustainable Chem. & Eng.*, 2021, **9**, 6056-6067.
5. C. Ke, M. Li, G. Fan, L. Yang and F. Li, *Chemistry*, 2018, **13**, 2714-2722.
6. H. Yu, K.-A. Kim, M. J. Kang, S. Y. Hwang and H. G. Cha, *ACS Sustainable Chem. Eng.*, 2019, **7**, 3742–3748.
7. J. Shen, H. Chen, K. Chen, Y. Qin, X. Lu, P. Ouyang and J. Fu, *Ind. Eng. Chem. Res.*, 2018, **57**, 2811–2818.
8. C. P. Ferraz, M. Zieliński, M. Pietrowski, S. Heyte, F. Dumeignil, L. M. Rossi and R. Wojcieszak, *ACS Sustainable Chem. & Eng.*, 2018, **6**, 16332-16340.
9. N. K. Gupta, S. Nishimura, A. Takagakib and K. Ebitani, *Green Chem.*, 2011, **13**, 824–827.
10. X. Wan, C. Zhou, J. Chen, W. Deng, Q. Zhang, Y. Yang and Y. Wang, *ACS Catal.*, 2014, **4**, 2175-2185.
11. Z. Gao, R. Xie, G. Fan, L. Yang and F. Li, *ACS Sustainable Chem. Eng.*, 2017, **5**, 5852–5861.
12. D. Bonincontro, A. Lolli, A. Villa, L. Prati, N. Dimitratos, G. M. Veith, L. E. Chinchilla, G. A. Botton, F. Cavani and S. Albonetti, *Green Chem.*, 2019, **21**, 4090–4099.
13. C. M. Pichler, M. G. Al-Shaal, D. Gu, H. Joshi, W. Ciptonugroho and F. Schuth, *ChemSusChem*, 2018, **11**, 2083-2090.
14. T. Gao, J. Chen, W. Fang, Q. Cao, W. Su and F. Dumeignil, *J. Catal.*, 2018, **368**, 53–68.
15. J. Artz and R. Palkovits, *ChemSusChem*, 2015, **8**, 3832 – 3838.
16. X. Liu, Y. Luo, H. Ma, S. Zhang, P. Che, M. Zhang, J. Gao and J. Xu, *Angew. Chem. Int. Ed.*, 2021, **60**, 2-10.
17. A. Tirsoaga, E. M. Fergani, I. V. Parvulescu and M. S. Coman, *ACS Sustainable Chem. Eng.*, 2018, **6**, 14292–14301.
18. X. Liao, J. Hou, Y. Wang, H. Zhang, Y. Sun, X. Li, S. Tang, K. Kato, Y. Miho and Z. Jiang, *Green Chem.*, 2019, **21**, 4194–4203.
19. W. Zhuang, X. Liu, L. Chen, P. Liu, H. Wen, Y. Zhou and J. Wang, *Green Chem.*, 2020, **22**, 4199–4209.
20. C. Chen, X. Li, L. Wang, T. Liang, L. Wang, Y. Zhang and J. Zhang, *ACS Sustainable Chem. &*

- Eng.*, 2017, **5**, 11300-11306.
21. B. Liu, Y. Ren and Z. Zhang, *Green Chem.*, 2015, **17**, 1610–1617.
22. Z. Zhang, J. Zhen, B. Liu, K. Lv and K. Deng, *Green Chem.*, 2015, **17**, 1308–1317.
23. N. Mei, B. Liu, J. Zheng, K. Lv, D. Tang and Z. Zhang, *Catal. Sci. Technol.*, 2015, **5**, 3194-3203.
24. B. Liu, Y. Ren and Z. Zhang, *Green Chem.*, 2015, **17**, 1610-1618.
25. K. Gupta, R. K. Rai, A. D. Dwivedi and S. K. Singh, *ChemCatChem*, 2017, **9**, 2760-2767.
26. Y. Liu, H.-Y. Ma, D. Lei, L.-L. Lou, S. Liu, W. Zhou, G.-C. Wang and K. Yu, *ACS Catal.*, 2019, **9**, 8306–8315.
27. S. E. Davis, B. N. Zope and R. J. Davis, *Green Chem.*, 2012, **14**, 143-147.
28. H. A. Rass, N. Essayem and M. Besson, *Green Chem.*, 2013, **15**, 2240–2251.
29. H. Ait Rass, N. Essayem and M. Besson, *ChemSusChem*, 2015, **8**, 1206-1217.
30. X. Liu, M. Zhang and Z. Li, *ACS Sustainable Chem. Eng.*, 2020, **8**, 4801–4808.
31. C. Megías-Sayago, K. Chakarova, A. Penkova, A. Lolli, S. Ivanova, S. Albonetti, F. Cavani and J. A. Odriozola, *ACS Catal.*, 2018, **8**, 11154–11164.
32. L. Ardemani, G. Cibin, A. J. Dent, M. A. Isaacs, G. Kyriakou, A. F. Lee, C. M. A. Parlett, S. A. Parry and K. Wilson, *Chem. Sci.*, 2015, **6**, 4940–4945.
33. Y. Y. Gorbanev, S. K. Klitgaard, J. M. Woodley, C. H. Christensen and A. Riisager, *ChemSusChem*, 2009, **2**, 672 – 675.
34. O. R. Schade, K. F. Kalz, D. Neukum, W. Kleist and J.-D. Grunwaldt, *Green Chem.*, 2018, **20**, 3530–3541.
35. G. Yi, S. P. Teong, X. Li and Y. Zhang, *ChemSusChem*, 2014, **7**, 2131 – 2137.
36. Q. Wang, W. Hou, S. Li, J. Xie, J. Li, Y. Zhou and J. Wang, *Green Chem.*, 2017, **19**, 3820-3830.
37. W. Guan, Y. Zhang, Y. Chen, J. Wu, Y. Cao, Y. Wei and P. Huo, *J. Catal.*, 2021, **396**, 40-53.
38. A. Villa, M. Schiavoni, S. Campisi, G. M. Veith and L. Prati, *ChemSusChem*, 2013, **6**, 609 – 612.
39. A. Rabee, S. D. Le, K. Higashimine and S. Nishimura, *ACS Sustainable Chem. Eng.*, 2020, **8**, 7150–7161.
40. B. Donoeva, N. Masoud and P. E. d. Jongh, *ACS Catal.*, 2017, **7**, 4581–4591.
41. T. Pasini, M. Piccinini, M. Blosi, R. Bonelli, S. Albonetti, N. Dimitratos, J. A. Lopez-Sanchez, M. Sankar, Q. He, C. J. Kiely, G. J. Hutchings and F. Cavania, *Green Chem.*, 2011, **13**, 2091-2099.
42. Y. Yamamoto, M. Ota, S. Kodama, K. Michimoto, A. Nomoto, A. Ogawa, M. Furuya and K. Kawakami, *ACS Omega*, 2021, **6**, 2239–2247.
43. G. Yi, S. P. Teong and Y. Zhang, *Green Chem.*, 2016, **18**, 979–983.
44. L. Bao, F.-Z. Sun, G.-Y. Zhang and T.-L. Hu, *ChemSusChem*, 2019, **13**, 548-555.
45. X. Wan, N. Tang, Q. Xie, S. Zhao, C. Zhou, Y. Dai and Y. Yang, *Catal. Sci. Technol.*, 2021, **11**, 1497-1509
46. E. Hayashi, T. Komanoya, K. Kamata and M. Hara, *ChemSusChem*, 2016, **10**, 654-658.
47. E. Hayashi, Y. Yamaguchi, K. Kamata, N. Tsunoda, Y. Kumagai, F. Oba and M. Hara, *J. Am. Chem. Soc.*, 2019, **141**, 890–900.

48. X. Zuo, P. Venkatasubramanian, D. H. Busch and B. Subramaniam, *ACS Sustainable Chem. Eng.*, 2016, **4**, 3659–3668.
